# Supplementary material for: Effect of Extraction Period on Total Phenolics, Total Flavonoids, and Antioxidant Capacity of Ugandan Camellia sinensis (L) Kuntze, Black Primary Grades and Green Tea
Source: Hindawi journal article supplement (doi:10.1155/2023/3504280), 2023-02-16
Supplement: f1 [file 3504280.f1.docx]

Supplementary 1. The data for effect of extraction period on total phenolic content, yield, total flavonoid content, % inhibition of DPPH, ferric reducing assay power (FRAP) of Ugandan Camellia sinensis black primary grades and green tea

|  |  |  |  | |  | |  | |
| --- | --- | --- | --- | --- | --- | --- | --- | --- |
|  | **TPC for four minutes steeping** | | | |  | |  | |
| D1 | PD | PF | BP | | GT | |  | |
| 4.551137 | 5.086915 | 3.42005 | 3.687939 | | 8.658769 | |  | |
| 4.72973 | 5.116681 | 3.598643 | 3.926063 | | 7.825336 | |  | |
| 4.848792 | 5.325039 | 3.807001 | 3.866532 | | 8.033694 | |  | |
| 4.491606 | 3.181926 | 3.211692 | 2.527087 | | 11.24836 | |  | |
| 3.181926 | 3.449815 | 3.390285 | 2.884272 | | 10.41493 | |  | |
| 3.033099 | 3.568877 | 3.479581 | 2.527087 | | 10.80188 | |  | |
| 4.015359 | 2.527087 | 4.164186 | 3.658174 | |  | |  | |
| 4.104655 | 2.854506 | 3.955828 | 3.777235 | |  | |  | |
| 4.313013 | 3.181926 | 4.164186 | 3.628408 | |  | |  | |
| **4.141035** | **3.810308** | **3.687939** | **3.386977** | | **9.497162** | |  | |
|  |  |  |  | |  | |  | |
|  |  |  |  | |  | |  | |
|  | **TPC for 40 minutes steeping** | | | |  | |  | |
| D1 | PD | PF | BP | | GT | |  | |
| 23.80045 | 21.53828 | 21.06203 | 22.96702 | | 27.01512 | |  | |
| 21.06203 | 19.03798 | 20.46672 | 22.60983 | | 25.8245 | |  | |
| 21.53828 | 20.10954 | 22.13359 | 22.84796 | | 23.20514 | |  | |
| 16.41862 | 18.56173 | 19.99048 | 20.46672 | | 24.2767 | |  | |
| 16.65674 | 20.10954 | 20.58578 | 18.6808 | | 26.30075 | |  | |
| 16.1805 | 19.63329 | 19.2761 | 20.34766 | | 28.20574 | |  | |
| 20.2286 | 21.7764 | 17.96642 | 21.65734 | |  | |  | |
| 19.03798 | 19.63329 | 17.96642 | 20.70485 | |  | |  | |
| 22.25265 | 20.34766 | 18.44267 | 20.10954 | |  | |  | |
|  |  |  |  | |  | |  | |
|  |  |  |  | |  | |  | |
|  | **Extract yield** |  |  | |  | |  | |
| Sample | *Buganda* | *Ankole* | *Kigezi* | | Green Tea | |  | |
| Extract Yield (mg/g) | 61.5 | 58 | 53 | | 73.5 | |  | |
|  |  |  |  | |  | |  | |
|  |  |  |  | |  | |  | |
|  |  |  |  | |  | |  | |
| **FLAVONOIDS (µgQE/mL)** | | | |  | |  | |  | |
| Buganda | Ankole | Kigezi | Green | |  | |  | |
| 71.06667 | 19.73333 | 24.23333 | 17.9 | |  | |  | |
| 71.06667 | 19.73333 | 24.9 | 17.73333 | |  | |  | |
| 71.06667 | 19.73333 | 25.73333 | 17.73333 | |  | |  | |
|  |  |  |  | |  | |  | |
| **FLAVONOIDS (µgQE/g dry sample)** |  |  |  | |  | |  | |
| 4370.6 | 1144.533 | 1284.367 | 1315.65 | |  | |  | |
| 4370.6 | 1144.533 | 1319.7 | 1303.4 | |  | |  | |
| 4370.6 | 1144.533 | 1363.867 | 1303.4 | |  | |  | |
|  |  |  |  | |  | |  | |
|  |  |  |  | |  | |  | |
|  |  |  |  | |  | |  | |
|  | **DPPH % inhibition** | |  | |  | |  | |
| Buganda | Ankole | Kigezi | GT | | Vit C | |  | |
| 88.71317 | 87.03147 | 85.28508 | 93.82297 | | 95.53701 | |  | |
| 88.74551 | 87.09615 | 85.44678 | 93.88765 | | 95.53701 | |  | |
| 88.74551 | 86.99913 | 85.34976 | 93.79063 | | 95.53701 | |  | |
|  |  |  |  | |  | |  | |
|  |  |  |  | |  | |  | |
| **FRAP (AAEµg/mL)** | |  |  | |  | |  | |
| Buganda | Ankole | Kigezi | GT | |  | |  | |
| 37.00299 | 36.04491 | 36.22455 | 39.45808 | |  | |  | |
| 37.00299 | 36.10479 | 36.19461 | 38.91916 | |  | |  | |
| 36.97305 | 36.13473 | 36.19461 | 38.73952 | |  | |  | |
